# Supplementary material for: Edesign: Primer and Enhanced Internal Probe Design Tool for Quantitative PCR Experiments and Genotyping Assays
Source: PubMed Central journal article supplement (PMC4749234; doi:10.1371/journal.pone.0146950), 2016-02-10
Supplement: pone.0146950.s002.pdf [file pone.0146950.s002.pdf]

A. Overall structure of Edesign core program

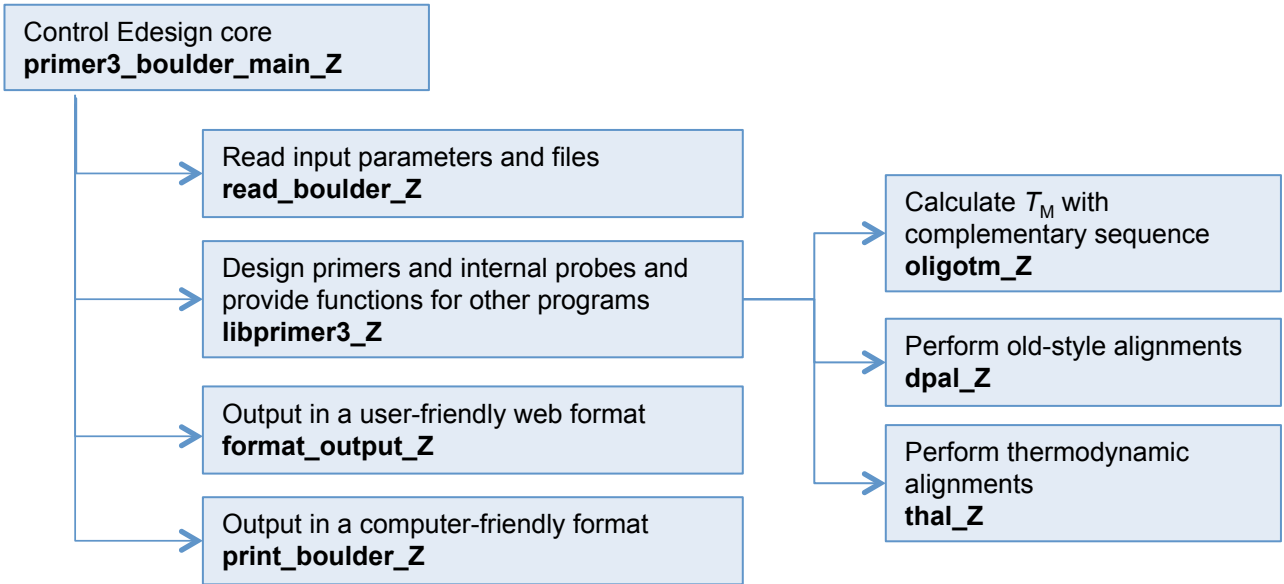

B. Workflow of primer and internal probe design in libprimer3\_Z

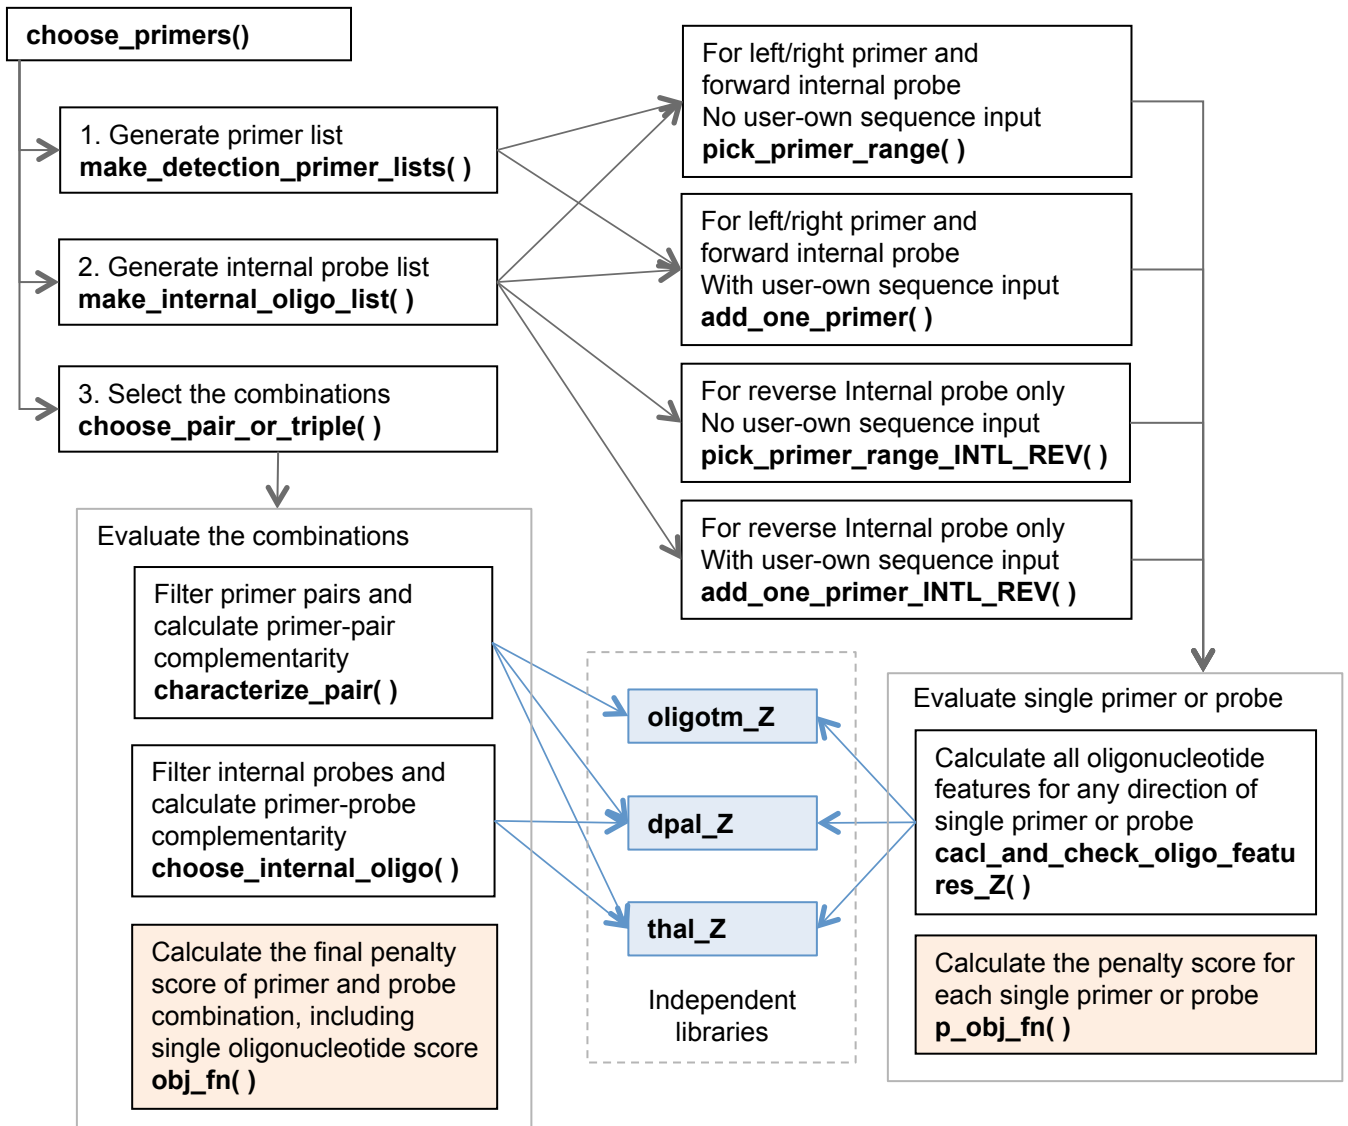

**S1 Fig. Schematic structure of Edesign core program.**

(A) Overall structure of Edesign core program. (B) Workflow of primer and internal probe design run by choose\_primers() in libprimer3\_Z.
