# Supplementary material for: Edesign: Primer and Enhanced Internal Probe Design Tool for Quantitative PCR Experiments and Genotyping Assays
Source: PubMed Central journal article supplement (PMC4749234; doi:10.1371/journal.pone.0146950), 2016-02-10
Supplement: pone.0146950.s009.pdf [file pone.0146950.s009.pdf]

Target sequence: influenza B virus genome segment 7 (matrix protein)

```
AAGAAAGGCCTGATTCTGGCTGAGAGAAAAATGAGAAGATGTGTGAGCTTTCATGAAGCATTGAAATAGCAGAAG
GCCATGAAAGCTCAGCGCTACTATACTGTCTCATGGTCATGTACCTGAATCCTGGAAATTATTCAATGCAAGTAAA
ACTAGGAACGCTCTGTGCTTTATGCGAGAAACAAGCATCACATTCACACAGGGCTCATAGCAGAGCAGCGAGATC
TTCAGTGCCTGGAGTGAGACGAGAAATGCAGATGGTCTCAGCTATGAACACAGCAAAAACAATGAATGGAATGGG
AAAAGGAGAAGACGTCCAAAAGCTGGCAGAAGAGCTGCAAAGCAACATTGGAGTGCTGAGATCTCTTGGGGCAA
GTCAAAGAATGGGGAAGGGATTGC
```

Edesign setting:

Positions below were set as “excluded positions” for primers and internal Eprobe in Edesign because of their high mutation rates in the virus:

6, 9, 18, 21, 27, 38, 51, 66, 75, 94, 99, 102, 108, 162, 174, 177, 180, 221, 222, 228, 234, 237, 246, 249, 258, 318, 324, 330, 336, 337, 339, 357, 358, 378, 396

Internal Probe Size Min: 14 Opt: 16 Max: 18

Internal Probe  $T_M$  Min: 54.0, Opt: 59.0, Max: 64.0

PRIMER\_PRODUCT\_SIZE\_RANGE: 150-250 100-300 301-400 401-500 501-600 601-700 701-850 851-1000

Weight of OLD: Pair 3' Complementarity: 1.0

Other parameter values were the same as the default settings of Edesign version 2.0.

Experimental Protocol:

PCR reactions were setup using 5  $\mu$ l of 5 $\times$ Light-Cycler 480 Genotyping Master (with 5% Formamide), 5  $\mu$ l template DNA, 0.2  $\mu$ M Eprobe, 0.9  $\mu$ M primer in opposite strand of Eprobe and 0.3  $\mu$ M primer in the same strand of Eprobe, in a total volume of 25  $\mu$ l. Real-time PCR experiments were run on a LightCycler 480 (Roche Diagnostics, Mannheim, Germany) after activation of the hot-start enzyme for 10 min at 95°C, followed by 50 cycles of 15 s at 95°C, 30 s at 57°C, and 30 s at 72°C.

Amplification signals were detected during the annealing step of each cycle at 57°C, using a SYBR Green I (483 nm–533 nm) filter for thiazole orange (D514). For melting curve analysis, the PCR was followed by heating the reaction mixture to 95°C for 15 s, cooling to 37°C, holding at 37°C for 7 min, and then slowly heating again to 95°C at a ramp rate 2.2°C/s and continuous fluorescence acquisition at the indicated wave length. All PCR reactions and melting curve experiments were always performed in triplicate, and each experiment included a negative control where 1 $\times$ TE Buffer (Promega Japan, Tokyo, Japan) was added instead of a template DNA.

The template concentration per reaction varied from 150 to 150,000,000 copies of plasmid DNA.
