# Supplementary material for: Edesign: Primer and Enhanced Internal Probe Design Tool for Quantitative PCR Experiments and Genotyping Assays
Source: PubMed Central journal article supplement (PMC4749234; doi:10.1371/journal.pone.0146950), 2016-02-10
Supplement: pone.0146950.s010.pdf [file pone.0146950.s010.pdf]

**S1 Table. New Functions in Edesign.**

| Category                                                                                                                                                                                               | New Function                                                                                                                                                                  | Name in Web interface                                                                                                                                                                                                                                             | Description                                                                                                                                                                                                                                                                                                    | modified CORE programs                                                                                                                                                                                                          |                                                                                                                |
|--------------------------------------------------------------------------------------------------------------------------------------------------------------------------------------------------------|-------------------------------------------------------------------------------------------------------------------------------------------------------------------------------|-------------------------------------------------------------------------------------------------------------------------------------------------------------------------------------------------------------------------------------------------------------------|----------------------------------------------------------------------------------------------------------------------------------------------------------------------------------------------------------------------------------------------------------------------------------------------------------------|---------------------------------------------------------------------------------------------------------------------------------------------------------------------------------------------------------------------------------|----------------------------------------------------------------------------------------------------------------|
| Enhanced internal probe design                                                                                                                                                                         | Internal probe design on any direction                                                                                                                                        | Internal Probe Direction                                                                                                                                                                                                                                          | Strand of internal probe can be selected from "Forward", "Reverse", "Any". "Any" will list candidate internal probe from both strands. When a user specifies own probe sequence, the user must specify "Forward" or Reverse".                                                                                  | read_boulder_Z.c<br>libprimer3_Z.h<br>libprimer3_Z.c                                                                                                                                                                            |                                                                                                                |
|                                                                                                                                                                                                        | Multiple Internal probe selection                                                                                                                                             | -                                                                                                                                                                                                                                                                 | Primer3 returns only one best internal probe for each of primer pair. Upgraded Edesign selection procedure returns multiple internal probes if their scores are high.                                                                                                                                          | libprimer3_Z.h<br>libprimer3_Z.c                                                                                                                                                                                                |                                                                                                                |
|                                                                                                                                                                                                        | Internal probe mishybridization check                                                                                                                                         | OLD: Internal Probe Max Template Mishyb<br>TH: Internal Probe Template Mishyb                                                                                                                                                                                     | Edesign calculates mishybridization of internal probe in the target sequence (binding to sequences except for intentional binding site).                                                                                                                                                                       | read_boulder_Z.c<br>libprimer3_Z.h<br>libprimer3_Z.c                                                                                                                                                                            |                                                                                                                |
|                                                                                                                                                                                                        | Primer-internal probe complement check                                                                                                                                        | OLD: Pair Max Any Complementarity<br>OLD: Pair Max 3' Complementarity<br>TH: Pair Max Any Complementarity<br>TH: Pair Max 3' Complementarity                                                                                                                      | Edesign includes complement check of Primer bound to Internal probe in Primer Pair complementary check.                                                                                                                                                                                                        | libprimer3_Z.h<br>libprimer3_Z.c                                                                                                                                                                                                |                                                                                                                |
| Genotyping mode                                                                                                                                                                                        | Genotyping mode ON/OFF                                                                                                                                                        | Genotyping by Internal Probe                                                                                                                                                                                                                                      | If this is checked, Edesign will attempt to prick internal probe to detect the target variant. Internal probe site is restricted to overlap the target variant. Target variant in the target sequence must be specified using "[", "]" and "/". Different variants are separated by "/".                       | primer3_boulder_main_Z.c<br>read_boulder_Z.c<br>libprimer3_Z.h<br>libprimer3_Z.c                                                                                                                                                |                                                                                                                |
|                                                                                                                                                                                                        | Setting for T <sub>M</sub> against target variant<br>(In the genotyping mode, Edesign calculates the melting temperatures of internal probes against Target Variant sequence) | Internal Probe T <sub>M</sub> Difference by Target Variant                                                                                                                                                                                                        | Penalty weight for the difference of the melting temperatures of an internal probe caused by the Target Variant. Larger the difference, it is easier to discriminate a mismatch case from a perfect match case. If this weight is larger than 0, higher penalty is given to smaller T <sub>M</sub> difference. | read_boulder_Z.c<br>libprimer3_Z.h<br>libprimer3_Z.c                                                                                                                                                                            |                                                                                                                |
|                                                                                                                                                                                                        |                                                                                                                                                                               | Internal Probe T <sub>M</sub> Min for Target Variant                                                                                                                                                                                                              | Edesign will NOT pick internal probes whose melting temperature against the target variant are smaller than this parameter.                                                                                                                                                                                    | read_boulder_Z.c<br>libprimer3_Z.h<br>libprimer3_Z.c                                                                                                                                                                            |                                                                                                                |
|                                                                                                                                                                                                        | Displaying T <sub>M</sub> for target variant                                                                                                                                  | tm(VAR)                                                                                                                                                                                                                                                           | T <sub>M</sub> of the primer or probe against the target variant sequence is displayed.                                                                                                                                                                                                                        | libprimer3_Z.h<br>libprimer3_Z.c<br>format_output_Z.c                                                                                                                                                                           |                                                                                                                |
| Treating modified oligonucleotides<br><br>Modification (ECHO)-specific features                                                                                                                        | Internal probe modification ON/OFF                                                                                                                                            | Set Internal Probe as Eprobe                                                                                                                                                                                                                                      | If this is checked, Edesign conducts design of primers and probes with modified nucleotide "Z".                                                                                                                                                                                                                | read_boulder_Z.c<br>libprimer3_Z.h<br>libprimer3_Z.c<br>format_output_Z.c<br>print_boulder_Z.c                                                                                                                                  |                                                                                                                |
|                                                                                                                                                                                                        | Left primer modification ON/OFF                                                                                                                                               | Set Left primer as Eprimer                                                                                                                                                                                                                                        |                                                                                                                                                                                                                                                                                                                |                                                                                                                                                                                                                                 |                                                                                                                |
|                                                                                                                                                                                                        | Right primer modification ON/OFF                                                                                                                                              | Set Right primer as Eprimer                                                                                                                                                                                                                                       |                                                                                                                                                                                                                                                                                                                |                                                                                                                                                                                                                                 |                                                                                                                |
|                                                                                                                                                                                                        | Set modifiable nucleotide                                                                                                                                                     | -                                                                                                                                                                                                                                                                 | Modifiable nucleotide ("A", "C", "G" or "T" converted to "Z") can be set for a custom Edesign                                                                                                                                                                                                                  | modification_Z.h                                                                                                                                                                                                                |                                                                                                                |
|                                                                                                                                                                                                        | Calculation of TM with modified nucleotide                                                                                                                                    | Primer T <sub>M</sub>                                                                                                                                                                                                                                             | Internal Probe T <sub>M</sub>                                                                                                                                                                                                                                                                                  | T <sub>M</sub> of oligomer is calculated with modified-nucleotide thermodynamics (ECHO/DNA thermodynamics)                                                                                                                      | oligotm_Z.c                                                                                                    |
|                                                                                                                                                                                                        |                                                                                                                                                                               | Internal Probe T <sub>M</sub>                                                                                                                                                                                                                                     |                                                                                                                                                                                                                                                                                                                |                                                                                                                                                                                                                                 |                                                                                                                |
|                                                                                                                                                                                                        | Calculation of oligomer complementarity with modified nucleotide                                                                                                              | OLD: Primer Max Template Mispriming                                                                                                                                                                                                                               | TH: Primer Max Template Mispriming                                                                                                                                                                                                                                                                             | When "Use Thermodynamic Alignment" is NOT checked (default), these parameters are calculated with scores:<br>match of A or T: 0.8<br>match of G or C: 1.2<br>match of Z (labelled T): 3.0<br>match of N: 0.25<br>mismatch: -1.0 | dpal_Z.c                                                                                                       |
|                                                                                                                                                                                                        |                                                                                                                                                                               | OLD: Pair Max Template Mispriming                                                                                                                                                                                                                                 |                                                                                                                                                                                                                                                                                                                |                                                                                                                                                                                                                                 |                                                                                                                |
|                                                                                                                                                                                                        |                                                                                                                                                                               | OLD: Primer Max Self Complementarity                                                                                                                                                                                                                              |                                                                                                                                                                                                                                                                                                                |                                                                                                                                                                                                                                 |                                                                                                                |
|                                                                                                                                                                                                        |                                                                                                                                                                               | OLD: Primer Max 3' Self Complementarity                                                                                                                                                                                                                           |                                                                                                                                                                                                                                                                                                                |                                                                                                                                                                                                                                 |                                                                                                                |
|                                                                                                                                                                                                        |                                                                                                                                                                               | OLD: Pair Max Any Complementarity                                                                                                                                                                                                                                 |                                                                                                                                                                                                                                                                                                                |                                                                                                                                                                                                                                 |                                                                                                                |
|                                                                                                                                                                                                        |                                                                                                                                                                               | OLD: Pair Max 3' Complementarity                                                                                                                                                                                                                                  |                                                                                                                                                                                                                                                                                                                |                                                                                                                                                                                                                                 |                                                                                                                |
|                                                                                                                                                                                                        |                                                                                                                                                                               | OLD: Internal Probe Max Template Mishyb                                                                                                                                                                                                                           |                                                                                                                                                                                                                                                                                                                |                                                                                                                                                                                                                                 |                                                                                                                |
|                                                                                                                                                                                                        |                                                                                                                                                                               | OLD: Internal Probe Max Self Complementarity                                                                                                                                                                                                                      |                                                                                                                                                                                                                                                                                                                |                                                                                                                                                                                                                                 |                                                                                                                |
|                                                                                                                                                                                                        |                                                                                                                                                                               | OLD: Internal Probe Max 3' Self Complementarity                                                                                                                                                                                                                   |                                                                                                                                                                                                                                                                                                                |                                                                                                                                                                                                                                 |                                                                                                                |
| TH: Primer Max Self Complementarity                                                                                                                                                                    |                                                                                                                                                                               |                                                                                                                                                                                                                                                                   |                                                                                                                                                                                                                                                                                                                |                                                                                                                                                                                                                                 |                                                                                                                |
| TH: Pair Max Template Mispriming                                                                                                                                                                       | When "Use Thermodynamic Alignment" is checked, these parameters are calculated with modified-nucleotide thermodynamics (ECHO/DNA thermodynamics).                             | thal_Z.c<br>primer3_config_Z/stack.dh<br>primer3_config_Z/stack.ds<br>primer3_config_Z/stackmm.dh<br>primer3_config_Z/stackmm.ds<br>primer3_config_Z/tstack.dh<br>primer3_config_Z/tstack2.dh<br>primer3_config_Z/tstack2.ds<br>primer3_config_Z/tstack_tm_inf.ds |                                                                                                                                                                                                                                                                                                                |                                                                                                                                                                                                                                 |                                                                                                                |
| TH: Primer Max 3' Self Complementarity                                                                                                                                                                 |                                                                                                                                                                               |                                                                                                                                                                                                                                                                   |                                                                                                                                                                                                                                                                                                                |                                                                                                                                                                                                                                 |                                                                                                                |
| TH: Pair Max Any Complementarity                                                                                                                                                                       |                                                                                                                                                                               |                                                                                                                                                                                                                                                                   |                                                                                                                                                                                                                                                                                                                |                                                                                                                                                                                                                                 |                                                                                                                |
| TH: Pair Max 3' Complementarity                                                                                                                                                                        |                                                                                                                                                                               |                                                                                                                                                                                                                                                                   |                                                                                                                                                                                                                                                                                                                |                                                                                                                                                                                                                                 |                                                                                                                |
| TH: Internal Probe Max Template Mishyb                                                                                                                                                                 |                                                                                                                                                                               |                                                                                                                                                                                                                                                                   |                                                                                                                                                                                                                                                                                                                |                                                                                                                                                                                                                                 |                                                                                                                |
| TH: Internal Probe Max Self Complementarity                                                                                                                                                            |                                                                                                                                                                               |                                                                                                                                                                                                                                                                   |                                                                                                                                                                                                                                                                                                                |                                                                                                                                                                                                                                 |                                                                                                                |
| TH: Internal Probe Max 3' Self Complementarity                                                                                                                                                         |                                                                                                                                                                               |                                                                                                                                                                                                                                                                   |                                                                                                                                                                                                                                                                                                                |                                                                                                                                                                                                                                 |                                                                                                                |
| TH: Primer Max Hairpin                                                                                                                                                                                 |                                                                                                                                                                               |                                                                                                                                                                                                                                                                   | Melting temperature of hairpin is calculated with modified-nucleotide thermodynamics (ECHO/DNA thermodynamics).                                                                                                                                                                                                |                                                                                                                                                                                                                                 |                                                                                                                |
| TH: Internal Probe Max Hairpin                                                                                                                                                                         |                                                                                                                                                                               |                                                                                                                                                                                                                                                                   |                                                                                                                                                                                                                                                                                                                |                                                                                                                                                                                                                                 |                                                                                                                |
| Setting for modified nucleotide position                                                                                                                                                               |                                                                                                                                                                               |                                                                                                                                                                                                                                                                   | Primer 5' Terminal Region Excluded for Labelling                                                                                                                                                                                                                                                               | Primer 3' Terminal Region Excluded for Labelling                                                                                                                                                                                | Edesign will examine all possible modification positions other than nucleotides specified by these parameters. |
|                                                                                                                                                                                                        | Internal Probe 5' Terminal Region Excluded for Labelling                                                                                                                      |                                                                                                                                                                                                                                                                   |                                                                                                                                                                                                                                                                                                                |                                                                                                                                                                                                                                 |                                                                                                                |
|                                                                                                                                                                                                        | Internal Probe 3' Terminal Region Excluded for Labelling                                                                                                                      | (Inner nucleotides of Eprimer/Eprobe are preferable to be labelled. Labelling 3' side nucleotides of Eprimer is also preferable since it will be inside after extension by polymerase.)                                                                           |                                                                                                                                                                                                                                                                                                                |                                                                                                                                                                                                                                 |                                                                                                                |
|                                                                                                                                                                                                        | Labelling Terminal Side                                                                                                                                                       | Penalty weight for modification positions next to the excluded region in case those positions are possible for modification but not a best option.                                                                                                                | read_boulder_Z.c<br>libprimer3_Z.h<br>libprimer3_Z.c                                                                                                                                                                                                                                                           |                                                                                                                                                                                                                                 |                                                                                                                |
|                                                                                                                                                                                                        | Setting for modified nucleotide position for Genotyping                                                                                                                       | Internal Probe Labelling Position against Target Variant                                                                                                                                                                                                          | If this is NOT checked (default), a modified nucleotide "Z" will be designed far from the target variant more than specified nucleotides (the default is 2: "Z" will be on 3, 4 or further nucleotide from the target variant.).                                                                               | read_boulder_Z.c<br>libprimer3_Z.h<br>libprimer3_Z.c                                                                                                                                                                            |                                                                                                                |
| If this is CHECKED, the modified nucleotide "Z" is designed near or on the target variant within specified nucleotides (the default is 1: "Z" will be on 0 or 1 nucleotides from the target variant.). |                                                                                                                                                                               |                                                                                                                                                                                                                                                                   |                                                                                                                                                                                                                                                                                                                |                                                                                                                                                                                                                                 |                                                                                                                |
