# Supplementary material for: Edesign: Primer and Enhanced Internal Probe Design Tool for Quantitative PCR Experiments and Genotyping Assays
Source: PubMed Central journal article supplement (PMC4749234; doi:10.1371/journal.pone.0146950), 2016-02-10
Supplement: pone.0146950.s011.pdf [file pone.0146950.s011.pdf]

**S2 Table. Thermodynamic parameters used for nearest neighbor parameters for mismatch next to labelled thymidine.**

|          |               |                       |                        | Observed thermodynamic parameters for ECHO/DNA |                                          |                           |                           |              |             |
|----------|---------------|-----------------------|------------------------|------------------------------------------------|------------------------------------------|---------------------------|---------------------------|--------------|-------------|
| Mismatch | Trinucleotide | ECHO sequence         | Antisense DNA sequence | $\Delta H^\circ$                               | $\Delta S^\circ$                         | $\Delta G^\circ_{37}$     | $\Delta G^\circ_{60}$     | $T_M$        |             |
| No       | type          | (5' to 3' / 5' to 3') | (5' to 3')             | [kcal mol <sup>-1</sup> ]                      | [cal mol <sup>-1</sup> K <sup>-1</sup> ] | [kcal mol <sup>-1</sup> ] | [kcal mol <sup>-1</sup> ] | [°C]         |             |
| 1        | E16/17_A      | GZA/TAA               | TGTGZATCTTTCTCTTTCTC   | GAGAAAGAGAAAGATAAACA                           | -137.6 ± 0.86                            | -375.6 ± 2.53             | -21.1 ± 0.07              | -12.5 ± 0.02 | 65.9 ± 0.03 |
| 2        | E16/17_G      | GZA/TAG               | TGTGZATCTTTCTCTTTCTC   | GAGAAAGAGAAAGATAGACA                           | -137.2 ± 1.07                            | -373.8 ± 3.19             | -21.3 ± 0.09              | -12.7 ± 0.03 | 66.4 ± 0.07 |
| 3        | E16/17_T      | GZA/TAT               | TGTGZATCTTTCTCTTTCTC   | GAGAAAGAGAAAGATATACA                           | -146.8 ± 3.65                            | -401.9 ± 10.79            | -22.1 ± 0.31              | -12.9 ± 0.08 | 66.5 ± 0.14 |
| 4        | E14/15_A      | AZC/GAA               | TGTGTAZCTTTCTCTTTCTC   | GAGAAAGAGAAAGAAACACA                           | -124.9 ± 0.79                            | -337.9 ± 2.28             | -20.1 ± 0.08              | -12.4 ± 0.04 | 66.3 ± 0.07 |
| 5        | E14/15_C      | AZC/GAC               | TGTGTAZCTTTCTCTTTCTC   | GAGAAAGAGAAAGACACACA                           | -120.2 ± 1.82                            | -323.0 ± 5.31             | -20.1 ± 0.17              | -12.6 ± 0.06 | 67.3 ± 0.09 |
| 6        | E14/15_G      | AZC/GAG               | TGTGTAZCTTTCTCTTTCTC   | GAGAAAGAGAAAGAGACACA                           | -127.6 ± 2.22                            | -343.7 ± 6.35             | -21.0 ± 0.26              | -13.1 ± 0.12 | 68.0 ± 0.23 |
| 7        | E12/13_A      | CZT/AAA               | TGTGTATCZTTCTCTTTCTC   | GAGAAAGAGAAAATACACA                            | -125.9 ± 0.24                            | -343.3 ± 0.75             | -19.4 ± 0.01              | -11.5 ± 0.00 | 63.8 ± 0.02 |
| 8        | E12/13_C      | CZT/AAC               | TGTGTATCZTTCTCTTTCTC   | GAGAAAGAGAAACATACACA                           | -104.7 ± 9.15                            | -282.1 ± 26.68            | -17.2 ± 0.87              | -10.7 ± 0.26 | 61.9 ± 0.69 |
| 9        | E12/13_T      | CZT/AAT               | TGTGTATCZTTCTCTTTCTC   | GAGAAAGAGAAAATACACA                            | -111.2 ± 8.35                            | -301.6 ± 24.36            | -17.7 ± 0.79              | -10.7 ± 0.23 | 61.9 ± 0.60 |
| 10       | E10/11_C      | TZC/GAC               | TGTGTATCTTCTCTTTCTC    | GAGAAAGAGACAGATACACA                           | -127.2 ± 2.40                            | -344.9 ± 6.79             | -20.2 ± 0.31              | -12.3 ± 0.16 | 65.9 ± 0.36 |
| 11       | E10/11_G      | TZC/GAG               | TGTGTATCTTCTCTTTCTC    | GAGAAAGAGAGATACACA                             | -134.8 ± 1.88                            | -364.7 ± 5.25             | -21.7 ± 0.25              | -13.3 ± 0.14 | 68.1 ± 0.24 |
| 12       | E10/11_T      | TZC/GAT               | TGTGTATCTTCTCTTTCTC    | GAGAAAGAGATAGATACACA                           | -134.0 ± 2.03                            | -364.2 ± 6.02             | -21.1 ± 0.18              | -12.7 ± 0.08 | 66.7 ± 0.19 |
| 13       | E18/17_A      | GZG/AAC               | TGZGTATCTTTCTCTTTCTC   | GAGAAAGAGAAAGATAAACA                           | -152.9 ± 7.43                            | -421.6 ± 21.61            | -22.2 ± 0.73              | -12.5 ± 0.24 | 65.4 ± 0.29 |
| 14       | E18/17_G      | GZG/GAC               | TGZGTATCTTTCTCTTTCTC   | GAGAAAGAGAAAGATAGACA                           | -145.1 ± 0.69                            | -398.6 ± 1.98             | -21.5 ± 0.08              | -12.3 ± 0.04 | 65.3 ± 0.09 |
| 15       | E18/17_T      | GZG/TAC               | TGZGTATCTTTCTCTTTCTC   | GAGAAAGAGAAAGATATACA                           | -166.8 ± 14.36                           | -461.0 ± 41.97            | -23.9 ± 1.34              | -13.2 ± 0.38 | 66.5 ± 0.22 |
| 16       | E16/15_A      | GZA/AAC               | TGTGZATCTTTCTCTTTCTC   | GAGAAAGAGAAAGAAACACA                           | -123.3 ± 1.36                            | -333.2 ± 4.03             | -20.0 ± 0.11              | -12.3 ± 0.04 | 66.1 ± 0.10 |
| 17       | E16/15_C      | GZA/CAC               | TGTGZATCTTTCTCTTTCTC   | GAGAAAGAGAAAGACACACA                           | -113.4 ± 0.61                            | -302.6 ± 1.93             | -19.6 ± 0.08              | -12.6 ± 0.08 | 67.7 ± 0.27 |
| 18       | E16/15_G      | GZA/GAC               | TGTGZATCTTTCTCTTTCTC   | GAGAAAGAGAAAGACACACA                           | -131.3 ± 1.29                            | -354.8 ± 3.78             | -21.3 ± 0.13              | -13.1 ± 0.05 | 68.0 ± 0.09 |
| 19       | E14/13_A      | AZC/AAT               | TGTGTAZCTTTCTCTTTCTC   | GAGAAAGAGAAAATACACA                            | -116.8 ± 11.20                           | -318.0 ± 32.63            | -18.2 ± 1.08              | -10.8 ± 0.33 | 62.2 ± 0.79 |
| 20       | E14/13_C      | AZC/CAT               | TGTGTAZCTTTCTCTTTCTC   | GAGAAAGAGAAACATACACA                           | -90.1 ± 0.00                             | -237.4 ± 0.00             | -16.4 ± 0.00              | -11.0 ± 0.00 | 63.4 ± 0.00 |
| 21       | E14/13_T      | AZC/TAT               | TGTGTAZCTTTCTCTTTCTC   | GAGAAAGAGAAAATACACA                            | -121.2 ± 4.59                            | -329.4 ± 13.62            | -19.1 ± 0.37              | -11.5 ± 0.05 | 63.9 ± 0.00 |
| 22       | E12/11_C      | CZT/CAG               | TGTGTATCZTTCTCTTTCTC   | GAGAAAGAGACAGATACACA                           | -111.3 ± 1.70                            | -297.5 ± 5.17             | -19.0 ± 0.10              | -12.2 ± 0.03 | 66.5 ± 0.17 |
| 23       | E12/11_G      | CZT/GAG               | TGTGTATCZTTCTCTTTCTC   | GAGAAAGAGAGATAGATACACA                         | -129.8 ± 1.99                            | -351.4 ± 5.80             | -20.8 ± 0.20              | -12.7 ± 0.08 | 67.0 ± 0.14 |
| 24       | E12/11_T      | CZT/TAG               | TGTGTATCZTTCTCTTTCTC   | GAGAAAGAGATAGATACACA                           | -125.9 ± 1.62                            | -339.8 ± 4.74             | -20.5 ± 0.15              | -12.7 ± 0.05 | 67.2 ± 0.09 |

  

| Thermodynamic parameters of normal DNA |                  |                           |                                          |                           |                           | Positional effect      |                           |                                          |                             |                           |
|----------------------------------------|------------------|---------------------------|------------------------------------------|---------------------------|---------------------------|------------------------|---------------------------|------------------------------------------|-----------------------------|---------------------------|
| Mismatch                               | $\Delta H^\circ$ | $\Delta S^\circ$          | $\Delta G^\circ_{37}$                    | $\Delta G^\circ_{60}$     | $\Delta T_M$              | $\Delta\Delta H^\circ$ | $\Delta\Delta S^\circ$    | $\Delta\Delta G^\circ_{37}$              | $\Delta\Delta G^\circ_{60}$ |                           |
| No                                     | type             | [kcal mol <sup>-1</sup> ] | [cal mol <sup>-1</sup> K <sup>-1</sup> ] | [kcal mol <sup>-1</sup> ] | [kcal mol <sup>-1</sup> ] | [°C]                   | [kcal mol <sup>-1</sup> ] | [cal mol <sup>-1</sup> K <sup>-1</sup> ] | [kcal mol <sup>-1</sup> ]   | [kcal mol <sup>-1</sup> ] |
| 1                                      | E16/17_A         | -134.80                   | -379.46                                  | -17.11                    | -8.38                     | 55.91                  | 17.3 ± 4.66               | 52.3 ± 13.55                             | 1.1 ± 0.49                  | -0.1 ± 0.23               |
| 2                                      | E16/17_G         | -139.10                   | -391.49                                  | -17.68                    | -8.68                     | 56.72                  | 19.6 ± 4.39               | 58.7 ± 12.64                             | 1.4 ± 0.53                  | 0.1 ± 0.31                |
| 3                                      | E16/17_T         | -139.80                   | -394.36                                  | -17.49                    | -8.42                     | 56.14                  | 20.7 ± 3.52               | 62.8 ± 10.03                             | 1.3 ± 0.46                  | -0.2 ± 0.29               |
| 4                                      | E14/15_A         | -133.90                   | -373.30                                  | -18.12                    | -9.53                     | 58.70                  | 11.7 ± 9.41               | 31.2 ± 28.10                             | 2.0 ± 0.72                  | 1.3 ± 0.20                |
| 5                                      | E14/15_C         | -131.00                   | -365.21                                  | -17.73                    | -9.33                     | 58.16                  | 11.2 ± 4.75               | 30.0 ± 14.02                             | 1.9 ± 0.46                  | 1.2 ± 0.23                |
| 6                                      | E14/15_G         | -139.70                   | -389.23                                  | -18.98                    | -10.03                    | 59.93                  | 15.8 ± 7.79               | 45.5 ± 23.20                             | 1.6 ± 0.64                  | 0.6 ± 0.24                |
| 7                                      | E12/13_A         | -128.20                   | -361.47                                  | -16.09                    | -7.78                     | 54.17                  | 5.2 ± 8.06                | 13.3 ± 24.19                             | 1.1 ± 0.65                  | 0.8 ± 0.35                |
| 8                                      | E12/13_C         | -132.00                   | -374.27                                  | -15.92                    | -7.31                     | 53.21                  | 19.3 ± 19.12              | 55.1 ± 56.84                             | 2.2 ± 1.55                  | 1.0 ± 0.48                |
| 9                                      | E12/13_T         | -138.10                   | -391.75                                  | -16.60                    | -7.59                     | 54.15                  | 10.7 ± 11.03              | 31.7 ± 33.00                             | 0.9 ± 0.85                  | 0.2 ± 0.31                |
| 10                                     | E10/11_C         | -136.60                   | -384.04                                  | -17.49                    | -8.66                     | 56.62                  | 8.3 ± 8.71                | 24.3 ± 25.66                             | 0.8 ± 0.78                  | 0.2 ± 0.27                |
| 11                                     | E10/11_G         | -138.60                   | -389.39                                  | -17.83                    | -8.87                     | 57.18                  | 12.1 ± 6.97               | 36.3 ± 20.92                             | 0.8 ± 0.55                  | 0.0 ± 0.26                |
| 12                                     | E10/11_T         | -140.80                   | -397.52                                  | -17.51                    | -8.37                     | 56.05                  | 13.9 ± 9.39               | 42.5 ± 27.79                             | 0.7 ± 0.80                  | -0.3 ± 0.26               |
| 13                                     | E18/17_A         | -134.80                   | -379.46                                  | -17.11                    | -8.38                     | 55.91                  | 17.3 ± 4.66               | 52.3 ± 13.55                             | 1.1 ± 0.49                  | -0.1 ± 0.23               |
| 14                                     | E18/17_G         | -139.10                   | -391.49                                  | -17.68                    | -8.68                     | 56.72                  | 19.6 ± 4.39               | 58.7 ± 12.64                             | 1.4 ± 0.53                  | 0.1 ± 0.31                |
| 15                                     | E18/17_T         | -139.80                   | -394.36                                  | -17.49                    | -8.42                     | 56.14                  | 20.7 ± 3.52               | 62.8 ± 10.03                             | 1.3 ± 0.46                  | -0.2 ± 0.29               |
| 16                                     | E16/15_A         | -133.90                   | -373.30                                  | -18.12                    | -9.53                     | 58.70                  | 11.7 ± 9.41               | 31.2 ± 28.10                             | 2.0 ± 0.72                  | 1.3 ± 0.20                |
| 17                                     | E16/15_C         | -131.00                   | -365.21                                  | -17.73                    | -9.33                     | 58.16                  | 11.2 ± 4.75               | 30.0 ± 14.02                             | 1.9 ± 0.46                  | 1.2 ± 0.23                |
| 18                                     | E16/15_G         | -139.70                   | -389.23                                  | -18.98                    | -10.03                    | 59.93                  | 15.8 ± 7.79               | 45.5 ± 23.20                             | 1.6 ± 0.64                  | 0.6 ± 0.24                |
| 19                                     | E14/13_A         | -128.20                   | -361.47                                  | -16.09                    | -7.78                     | 54.17                  | 5.2 ± 8.06                | 13.3 ± 24.19                             | 1.1 ± 0.65                  | 0.8 ± 0.35                |
| 20                                     | E14/13_C         | -132.00                   | -374.27                                  | -15.92                    | -7.31                     | 53.21                  | 19.3 ± 19.12              | 55.1 ± 56.84                             | 2.2 ± 1.55                  | 1.0 ± 0.48                |
| 21                                     | E14/13_T         | -138.10                   | -391.75                                  | -16.60                    | -7.59                     | 54.15                  | 10.7 ± 11.03              | 31.7 ± 33.00                             | 0.9 ± 0.85                  | 0.2 ± 0.31                |
| 22                                     | E12/11_C         | -136.60                   | -384.04                                  | -17.49                    | -8.66                     | 56.62                  | 8.3 ± 8.71                | 24.3 ± 25.66                             | 0.8 ± 0.78                  | 0.2 ± 0.27                |
| 23                                     | E12/11_G         | -138.60                   | -389.39                                  | -17.83                    | -8.87                     | 57.18                  | 12.1 ± 6.97               | 36.3 ± 20.92                             | 0.8 ± 0.55                  | 0.0 ± 0.26                |
| 24                                     | E12/11_T         | -140.80                   | -397.52                                  | -17.51                    | -8.37                     | 56.05                  | 13.9 ± 9.39               | 42.5 ± 27.79                             | 0.7 ± 0.80                  | -0.3 ± 0.26               |

  

| Nearest Neighbor parameters of full-match |                  |                        |                           |                                          |                             | Nearest Neighbor parameters with mismatch |                        |                           |                                          |                             |                           |
|-------------------------------------------|------------------|------------------------|---------------------------|------------------------------------------|-----------------------------|-------------------------------------------|------------------------|---------------------------|------------------------------------------|-----------------------------|---------------------------|
| Mismatch                                  | Nearest neighbor | $\Delta\Delta H^\circ$ | $\Delta\Delta S^\circ$    | $\Delta\Delta G^\circ_{37}$              | $\Delta\Delta G^\circ_{60}$ | Nearest neighbor                          | $\Delta\Delta H^\circ$ | $\Delta\Delta S^\circ$    | $\Delta\Delta G^\circ_{37}$              | $\Delta\Delta G^\circ_{60}$ |                           |
| No                                        | type             | (5' to 3' / 5' to 3')  | [kcal mol <sup>-1</sup> ] | [cal mol <sup>-1</sup> K <sup>-1</sup> ] | [kcal mol <sup>-1</sup> ]   | [kcal mol <sup>-1</sup> ]                 | (5' to 3' / 5' to 3')  | [kcal mol <sup>-1</sup> ] | [cal mol <sup>-1</sup> K <sup>-1</sup> ] | [kcal mol <sup>-1</sup> ]   | [kcal mol <sup>-1</sup> ] |
| 1                                         | E16/17_A         | ZA/TA                  | -8.9 ± 0.73               | -20.7 ± 1.26                             | -2.4 ± 0.20                 | -1.9 ± 0.10                               | GZ/AA                  | -11.2 ± 4.79              | -27.7 ± 13.84                            | -2.6 ± 0.53                 | -2.0 ± 0.25               |
| 2                                         | E16/17_G         | ZA/TA                  | -8.9 ± 0.73               | -20.7 ± 1.26                             | -2.4 ± 0.20                 | -1.9 ± 0.10                               | GZ/AG                  | -8.9 ± 4.58               | -20.2 ± 13.10                            | -2.6 ± 0.57                 | -2.1 ± 0.33               |
| 3                                         | E16/17_T         | ZA/TA                  | -8.9 ± 0.73               | -20.7 ± 1.26                             | -2.4 ± 0.20                 | -1.9 ± 0.10                               | GZ/AT                  | -18.9 ± 5.13              | -49.7 ± 14.79                            | -3.5 ± 0.60                 | -2.3 ± 0.32               |
| 4                                         | E14/15_A         | ZC/GA                  | -8.9 ± 0.73               | -21.3 ± 1.25                             | -2.3 ± 0.22                 | -1.8 ± 0.14                               | AZ/AA                  | 6.2 ± 9.47                | 25.4 ± 28.22                             | -1.7 ± 0.76                 | -2.3 ± 0.24               |
| 5                                         | E14/15_C         | ZC/GA                  | -8.9 ± 0.73               | -21.3 ± 1.25                             | -2.3 ± 0.22                 | -1.8 ± 0.14                               | AZ/AC                  | 8.5 ± 5.14                | 33.6 ± 15.04                             | -1.9 ± 0.54                 | -2.7 ± 0.28               |
| 6                                         | E14/15_G         | ZC/GA                  | -8.9 ± 0.73               | -21.3 ± 1.25                             | -2.3 ± 0.22                 | -1.8 ± 0.14                               | AZ/AG                  | 5.3 ± 8.13                | 21.3 ± 24.08                             | -1.3 ± 0.72                 | -1.8 ± 0.30               |
| 7                                         | E12/13_A         | ZT/AA                  | -1.2 ± 0.72               | 0.5 ± 1.24                               | -1.3 ± 0.21                 | -1.3 ± 0.11                               | CZ/AA                  | -1.7 ± 8.10               | 4.4 ± 24.24                              | -3.0 ± 0.68                 | -3.1 ± 0.36               |
| 8                                         | E12/13_C         | ZT/AA                  | -1.2 ± 0.72               | 0.5 ± 1.24                               | -1.3 ± 0.21                 | -1.3 ± 0.11                               | CZ/AC                  | 9.2 ± 21.21               | 36.6 ± 62.80                             | -2.1 ± 1.79                 | -3.0 ± 0.56               |
| 9                                         | E12/13_T         | ZT/AA                  | -1.2 ± 0.72               | 0.5 ± 1.24                               | -1.3 ± 0.21                 | -1.3 ± 0.11                               | CZ/AT                  | 17.3 ± 13.85              | 58.0 ± 41.03                             | -0.6 ± 1.18                 | -2.0 ± 0.40               |
| 10                                        | E10/11_C         | ZC/GA                  | -8.9 ± 0.73               | -21.3 ± 1.25                             | -2.3 ± 0.22                 | -1.8 ± 0.14                               | TZ/AC                  | 10.0 ± 9.06               | 36.2 ± 26.58                             | -1.2 ± 0.87                 | -2.0 ± 0.35               |
| 11                                        | E10/11_G         | ZC/GA                  | -8.9 ± 0.73               | -21.3 ± 1.25                             | -2.3 ± 0.22                 | -1.8 ± 0.14                               | TZ/AG                  | 0.7 ± 7.26                | 9.7 ± 21.61                              | -2.3 ± 0.64                 | -2.6 ± 0.32               |
| 12                                        | E10/11_T         | ZC/GA                  | -8.9 ± 0.73               | -21.3 ± 1.25                             | -2.3 ± 0.22                 | -1.8 ± 0.14                               | TZ/AT                  | 1.8 ± 9.63                | 12.2 ± 28.46                             | -2.0 ± 0.85                 | -2.3 ± 0.31               |
| 13                                        | E18/17_A         | GZ/AC                  | -3.9 ± 0.69               | -7.0 ± 1.18                              | -1.8 ± 0.20                 | -1.6 ± 0.11                               | ZG/AA                  | -31.5 ± 8.80              | -87.4 ± 25.54                            | -4.4 ± 0.90                 | -2.4 ± 0.35               |
| 14                                        | E18/17_G         | GZ/AC                  | -3.9 ± 0.69               | -7.0 ± 1.18                              | -1.8 ± 0.20                 | -1.6 ± 0.11                               | ZG/GA                  | -21.7 ± 4.50              | -58.7 ± 12.85                            | -3.5 ± 0.57                 | -2.2 ± 0.33               |
| 15                                        | E18/17_T         | GZ/AC                  | -3.9 ± 0.69               | -7.0 ± 1.18                              | -1.8 ± 0.20                 | -1.6 ± 0.11                               | ZG/TA                  | -43.8 ± 14.80             | -122.4 ± 43.16                           | -5.8 ± 1.44                 | -3.0 ± 0.49               |
| 16                                        | E16/15_A         | GZ/AC                  | -3.9 ± 0.69               | -7.0 ± 1.18                              | -1.8 ± 0.20                 | -1.6 ± 0.11                               | ZA/AA                  | 2.9 ± 9.53                | 15.9 ± 28.42                             | -2.0 ± 0.75                 | -2.4 ± 0.23               |
| 17                                        | E16/15_C         | GZ/AC                  | -3.9 ± 0.69               | -7.0 ± 1.18                              | -1.8 ± 0.20                 | -1.6 ± 0.11                               | ZA/CA                  | 10.3 ± 4.84               | 39.6 ± 14.20                             | -2.0 ± 0.51                 | -2.9 ± 0.27               |
| 18                                        | E16/15_G         | GZ/AC                  | -3.9 ± 0.69               | -7.0 ± 1.18                              | -1.8 ± 0.20                 | -1.6 ± 0.11                               | ZA/GA                  | -3.4 ± 7.93               | -4.1 ± 23.53                             | -2.2 ± 0.68                 | -2.1 ± 0.27               |
| 19                                        | E14/13_A         | AZ/AT                  | -6.9 ± 0.75               | -16.1 ± 1.30                             | -1.9 ± 0.22                 | -1.5 ± 0.10                               | ZC/AA                  | 13.1 ± 13.82              | 46.2 ± 40.64                             | -1.3 ± 1.28                 | -2.3 ± 0.49               |
| 20                                        | E14/13_C         | AZ/AT                  | -6.9 ± 0.75               | -16.1 ± 1.30                             | -1.9 ± 0.22                 | -1.5 ± 0.10                               | ZC/CA                  | 29.5 ± 19.14              | 97.8 ± 56.85                             | -0.8 ± 1.57                 | -3.1 ± 0.49               |
| 21                                        | E14/13_T         | AZ/AT                  | -6.9 ± 0.75               | -16.1 ± 1.30                             | -1.9 ± 0.22                 | -1.5 ± 0.10                               | ZC/TA                  | 13.0 ± 11.97              | 46.7 ± 35.72                             | -1.5 ± 0.95                 | -2.6 ± 0.33               |
| 22                                        | E12/11_C         | CZ/AG                  | -6.9 ± 0.58               | -13.4 ± 1.01                             | -2.7 ± 0.18                 | -2.4 ± 0.12                               | ZT/CA                  | 23.9 ± 8.89               | 75.7 ± 26.20                             | 0.4 ± 0.80                  | -1.4 ± 0.30               |
| 23                                        | E12/11_G         | CZ/AG                  | -6.9 ± 0.58               | -13.4 ± 1.01                             | -2.7 ± 0.18                 | -2.4 ± 0.12                               | ZT/GA                  | 3.6 ± 7.28                | 15.2 ± 21.73                             | -1.1 ± 0.61                 | -1.5 ± 0.29               |
| 24                                        | E12/11_T         | CZ/AG                  | -6.9 ± 0.58               | -13.4 ± 1.01                             | -2.7 ± 0.18                 | -2.4 ± 0.12                               | ZT/TA                  | 7.9 ± 9.55                | 28.7 ± 28.21                             | -1.0 ± 0.83                 | -1.7 ± 0.29               |
