# Supplementary material for: Edesign: Primer and Enhanced Internal Probe Design Tool for Quantitative PCR Experiments and Genotyping Assays
Source: PubMed Central journal article supplement (PMC4749234; doi:10.1371/journal.pone.0146950), 2016-02-10
Supplement: pone.0146950.s012.pdf [file pone.0146950.s012.pdf]

**S3 Table. Evaluation of hairpin stability prediction.**

| Name      | ECHO Sequence                         | DNA oligomer<br>$T_M$ [°C] | Observed<br>$T_M$ [°C] | Predicted<br>$T_M$ [°C] | $T_M$ difference<br>(Obs - Pre)<br>[°C] |
|-----------|---------------------------------------|----------------------------|------------------------|-------------------------|-----------------------------------------|
| TE_SLF_1  | ACTTTTT <sup>E</sup> GCATTAGCAAAT     | 67.3                       | 78.3 ± 0.6             | 96.8                    | -18.5                                   |
| TE_SLF_2  | ACTTT <sup>E</sup> TTTGCATTAGCAAAT    | 67.3                       | 68.0 ± 0.9             | 68.2                    | -0.2                                    |
| TE_SLF_3  | ACTT <sup>E</sup> TTTTGCATTAGCAAAT    | 67.3                       | 80.4 ± 0.5             | 68.2                    | 12.2                                    |
| TE_SLF_4  | ACT <sup>E</sup> TTTTTGCATTAGCAAAT    | 67.3                       | 77.8 ± 0.6             | 68.2                    | 9.6                                     |
| TE_SLF_5  | ACTTTCGTTTT <sup>E</sup> TTTAAACGT    | 65.2                       | 73.6 ± 6.3             | 62.6                    | 11.0                                    |
| TE_SLF_6  | ACTTTCGT <sup>E</sup> TTTTTTAAACGT    | 65.2                       | 79.0 ± 0.2             | 81.6                    | -2.6                                    |
| TE_SLF_7  | ACTTTCGTTTTTT <sup>E</sup> AAACGT     | 65.2                       | 66.1 ± 5.4             | 62.6                    | 3.5                                     |
| TE_SLF_8  | ACTTTCGTTTTT <sup>E</sup> TAAACGT     | 65.2                       | 77.0 ± 0.9             | 62.6                    | 14.4                                    |
| TE_SLF_9  | TTTT <sup>E</sup> ATACATCTATAAAA      | 49.5                       | 62.4 ± 2.3             | 72.8                    | -10.4                                   |
| TE_SLF_10 | AGATTTT <sup>E</sup> GGAGGAACCAAACCTG | 65.4                       | 76.7 ± 0.1             | 93.1                    | -16.4                                   |
| TE_SLF_11 | AGATTTT <sup>E</sup> GGCGGCCCAAACCTG  | 64.2                       | 76.2 ± 0.6             | 95.5                    | -19.3                                   |
| TE_SLF_12 | AGATTTT <sup>E</sup> CGGCGGCCCAAACCTG | 38.5                       | 69.2 ± 3.2             | 75.4                    | -6.2                                    |

Summary of ECHO self-folding prediction. 'T<sup>E</sup>'s in ECHO sequences indicates the thiazole orange double-labeled thymidine, underlined sequences are presumable double-stranded stem regions. The observed  $T_M$  values were obtained in the same way as described in MATERIALS AND METHODS. Predicted  $T_M$  values were calculated by the updated thermodynamic alignment program, "thal\_Z", under the salt condition used in the experiments (program parameters set to 1000.2 mM of Na<sup>+</sup> and 0 mM of Mg<sup>2+</sup>). As a reference, DNA oligonucleotide  $T_M$  values were calculated in the same way for DNA sequences of the same compositions (replacing of T<sup>E</sup> by T). The averaged difference between the observed and predicted  $T_M$  values was  $-1.9 \pm 12.3$  °C.
